# Supplementary material for: Altered expression of miRNA profile in peripheral blood mononuclear cells following the third dose of inactivated COVID-19 vaccine
Source: PeerJ. 2025 Jan 22;13:e18856. doi: 10.7717/peerj.18856 (PMC11760199; doi:10.7717/peerj.18856)
Supplement: Supplemental Information 2 [file peerj-13-18856-s002.xls]

## Sheet: Sheet1
ITEM TO CHECK	IMPORTANCE	CHECKLIST
EXPERIMENTAL DESIGN
Definition of experimental and control groups	E	Line 120
Number within each group	E	Line 120
Assay carried out by core lab or investigator's lab?	D	Investigator's lab
Acknowledgement of authors' contributions	D
SAMPLE
Description	E	Line 95-104
Volume/mass of sample processed	D	Line 95 and 103
Microdissection or macrodissection	E	N/A
Processing procedure	E	Line 95-104
If frozen - how and how quickly?	E	Line 103-104
If fixed - with what, how quickly?	E	N/A
Sample storage conditions and duration (especially for FFPE samples)	E	Line 104
NUCLEIC ACID EXTRACTION
Procedure and/or instrumentation	E	Line 120-125
Name of kit and details of any modifications	E	122-123
Source of additional reagents used	D	N/A
Details of DNase or RNAse treatment	E	Line 122
Contamination assessment (DNA or RNA)	E	Reverse transcription controls (without enzyme) were performed in order to assess the existence of DNA in the RNA sample.
Nucleic acid quantification	E	Line 123-125
Instrument and method	E	Line 124-125
Purity (A260/A280)	D	Line 124-125
Yield	D	N/A
RNA integrity method/instrument	E	The RNA integrity was examined by visual inspection on agarose gel.
RIN/RQI or Cq of 3' and 5' transcripts	E	N/A
Electrophoresis traces	D	N/A
Inhibition testing (Cq dilutions, spike or other)	E	N/A
REVERSE TRANSCRIPTION
Complete reaction conditions	E	Line 125-128
Amount of RNA and reaction volume	E	Line 126-127
Priming oligonucleotide (if using GSP) and concentration	E	Line 125-128
Reverse transcriptase and concentration	E	Line 125-128
Temperature and time	E	Line 128
Manufacturer of reagents and catalogue numbers	D	Line 126
Cqs with and without RT	D*	Cq > 38 without RT
Storage conditions of cDNA	D	At -20°C if not immediately used
qPCR TARGET INFORMATION
If multiplex, efficiency and LOD of each assay.	E	N/A
Sequence accession number	E	https://mirbase.org/
Location of amplicon	D	https://mirbase.org/
Amplicon length	E	Less than 75 bp
In silico specificity screen (BLAST, etc)	E	N/A
Pseudogenes, retropseudogenes or other homologs?	D	N/A
Sequence alignment	D	N/A
Secondary structure analysis of amplicon	D	N/A
Location of each primer by exon or intron (if applicable)	E	N/A
What splice variants are targeted?	E	N/A
qPCR OLIGONUCLEOTIDES
Primer sequences	E	Line 135-138 and manufacturer's proprietary information
RTPrimerDB Identification Number	D	Line 135-138 and manufacturer's proprietary information
Probe sequences	D**	Line 135-138 and manufacturer's proprietary information
Location and identity of any modifications	E	N/A
Manufacturer of oligonucleotides	D	Line 137-138
Purification method	D	N/A
qPCR PROTOCOL
Complete reaction conditions	E	Line 128-131
Reaction volume and amount of cDNA/DNA	E	Reaction volume: 25ul; amount of cDNA: 2ul.
Primer, (probe), Mg++ and dNTP concentrations	E	Line 128-131
Polymerase identity and concentration	E	Line 128-131
Buffer/kit identity and manufacturer	E	Takara
Exact chemical constitution of the buffer	D	Line 128-131
Additives (SYBR Green I, DMSO, etc.)	E	TB Green
Manufacturer of plates/tubes and catalog number	D	Armadillo, AB2384B, Thermo Scientific
Complete thermocycling parameters	E	Line 130
Reaction setup (manual/robotic)	D	Manual
Manufacturer of qPCR instrument	E	Line 131
qPCR VALIDATION
Evidence of optimisation (from gradients)	D	Otimization guaranteed by the manufacturer of the kit.
Specificity (gel, sequence, melt, or digest)	E	Specificity guaranteed by manufacturer of the kit.
For SYBR Green I, Cq of the NTC	E	Above 38
Standard curves with slope and y-intercept	E	Line 131-135
PCR efficiency calculated from slope	E	Line 131-135
Confidence interval for PCR efficiency or standard error	D	N/A
r2 of standard curve	E	Line 131-135
Linear dynamic range	E	Line 131-135
Cq variation at lower limit	E	Line 131-135
Confidence intervals throughout range	D	N/A
Evidence for limit of detection	E	Measurements of all miRNAs were in linear dynamic range. It was not necessary to determine the limit of detection.
If multiplex, efficiency and LOD of each assay.	E	N/A
DATA ANALYSIS
qPCR analysis program (source, version)	E	Line 133
Cq method determination	E	Line 131-135
Outlier identification and disposition	E	There were no outlers.
Results of NTCs	E	Above 38
Justification of number and choice of reference genes	E	Line 134
Description of normalisation method	E	Line 134
Number and concordance of biological replicates	D	N/A
Number and stage (RT or qPCR) of technical replicates	E	Duplicate
Repeatability (intra-assay variation)	E	Line 131-135
Reproducibility (inter-assay variation, %CV)	D	N/A
Power analysis	D	N/A
Statistical methods for result significance	E	Line 150-153
Software (source, version)	E	Line 150-153
Cq or raw data submission using RDML	D	N/A
Table 1. MIQE checklist for authors, reviewers and editors. All essential information (E) must be submitted with the manuscript. Desirable
information (D) should be submitted if available. If using primers obtained from RTPrimerDB, information on qPCR target, oligonucleotides,
protocols and validation is available from that source.
*: Assessing the absence of DNA using a no RT assay is essential when first extracting RNA. Once the sample has been validated as
RDNA-free, inclusion of a no-RT control is desirable, but no longer essential.
**: Disclosure of the probe sequence is highly desirable and strongly encouraged. However, since not all commercial pre-designed assay
vendors provide this information, it cannot be an essential requirement. Use of such assays is advised against.
