# Supplementary material for: Altered expression of miRNA profile in peripheral blood mononuclear cells following the third dose of inactivated COVID-19 vaccine
Source: PeerJ. 2025 Jan 22;13:e18856. doi: 10.7717/peerj.18856 (PMC11760199; doi:10.7717/peerj.18856)
Supplement: Supplemental Information 3 [file peerj-13-18856-s003.xlsx]

## Sheet: Table 1-raw data
Number	Gender	Age	Date of the first dose	Date of the second dose	Date of the third dose	During peripheral blood samples harvested after the third dose
1	F	40	2021-01-08	2021-03-03	2021-11-18	12	Microarray analysis sample
2	F	47	2021-01-26	2021-02-23	2021-11-22	11	Microarray analysis sample
3	M	31	2021-04-08	2021-05-14	2021-11-24	14	Microarray analysis sample
4	F	30	2021-04-13	2021-05-19	2021-11-24	12	Microarray analysis sample
5	F	31	2021-04-13	2021-05-19	2021-11-24	12	Microarray analysis sample
6	M	31	2021-04-12	2021-05-18	2021-11-19	10	Microarray analysis sample
7	M	50	2021-02-02	2021-03-02	2021-11-22	11
8	F	31	2021-04-12	2021-05-18	2021-11-25	12
9	F	40	2021-04-08	2021-05-13	2021-11-17	12
10	F	33	2021-04-13	2021-05-19	2021-11-24	13
11	M	32	2021-04-09	2021-05-14	2021-11-15	11
12	F	31	2021-04-13	2021-05-19	2021-11-22	11
13	F	32	2021-04-13	2021-05-19	2021-11-24	12
14	F	29	2021-04-12	2021-05-18	2021-11-24	12
15	F	42	2021-04-12	2021-05-18	2021-11-26	12
16	F	32	2021-04-12	2021-05-18	2021-11-22	14
17	M	31	2021-04-13	2021-05-19	2021-12-18	11
18	M	39	2021-04-12	2021-05-18	2021-11-24	12
19	M	35	2021-04-16	2021-05-18	2021-11-24	13
20	F	28	2021-04-16	2021-05-18	2021-12-19	13
21	F	29	2021-04-16	2021-05-18	2021-11-26	13
22	F	37	2021-04-12	2021-05-18	2021-11-24	9
23	F	31	2021-04-13	2021-05-19	2021-11-24	12
24	M	30	2021-04-13	2021-05-19	2021-11-26	11
25	F	30	2021-01-26	2021-02-19	2021-11-23	13
26	F	43	2021-01-26	2021-02-23	2021-11-23	14
27	M	30	2021-02-03	2021-03-10	2021-11-27	14
28	F	26	2021-04-19	2021-06-06	2022-01-01	9
29	F	30	2021-02-25	2021-03-25	2022-01-08	9
30	F	25	2021-04-26	2021-06-09	2022-01-11	14
31	F	25	2021-04-09	2021-05-17	2022-01-09	8
32	F	25	2021-04-15	2021-05-21	2022-01-02	8
33	M	25	2021-04-14	2021-05-20	2022-01-08	9
34	M	23	2021-01-13	2021-02-04	2021-12-24	14
35	F	24	2021-01-20	2021-02-04	2022-01-12	13
36	F	30	2021-04-26	2021-06-17	2022-01-08	9
37	M	34	2020-12-30	2021-01-21	2022-01-05	12

## Sheet: Figure 1-raw data
group	P-value	Adjusted P-Value	Fold Change	Regulation	Before	Before	Before	Before	Before	Before	After	After	After	After	After	After
systematic_name					B-1	B-2	B-3	B-4	B-5	B-6	A-1	A-2	A-3	A-4	A-5	A-6
hsa-miR-3159	0.0492109	0.0492109	1.66455	up	1.8747	-0.0563602	1.7061	1.52502	1.10586	1.55597	2.17061	1.84791	2.98709	1.92348	1.28037	1.91261
hsa-miR-411-3p	0.00347052	0.116262	2.53779	up	0.109836	-0.0563602	1.7061	1.52502	2.71176	1.55597	2.17061	1.84791	2.98709	3.04674	3.6488	1.91261
hsa-miR-182-3p	0.0266763	0.0744714	1.57505	up	1.98345	2.5225	1.7061	1.52502	1.10586	1.55597	3.33095	2.89679	2.98709	1.92348	1.28037	1.91261
hsa-miR-557	0.0317783	0.0473143	1.99296	up	0.109836	-0.0563602	1.91228	1.52502	1.10586	1.55597	2.17061	1.84791	2.98709	1.92348	1.28037	1.91261
hsa-miR-129-2-3p	0.00868018	0.116314	2.26508	up	0.109836	-0.0563602	1.7061	1.9514	1.88	1.55597	2.17061	1.84791	2.98709	2.76648	2.53962	1.91261
hsa-miR-1264	0.0435114	0.0477912	1.94744	up	0.109836	-0.0563602	2.86217	1.52502	2.64653	2.57228	2.17061	1.84791	2.98709	2.68913	2.8139	2.92032
hsa-miR-551a	0.0115795	0.110832	2.18162	up	0.109836	-0.0563602	2.63649	1.52502	1.9761	1.96758	2.17061	1.84791	2.98709	2.6387	2.58946	2.6773
hsa-miR-1306-5p	0.0131123	0.109815	2.26391	up	0.109836	-0.0563602	1.7061	1.52502	2.65262	2.52066	2.17061	1.84791	2.98709	2.75887	3.13487	2.63144
hsa-miR-668-3p	0.0131441	0.0978502	2.19491	up	0.109836	-0.0563602	1.7061	1.52502	1.10586	1.55597	2.17061	1.84791	2.98709	1.92348	1.90971	1.91261
hsa-miR-940	0.0408304	0.0488507	1.76161	up	3.18339	3.74299	4.19544	4.18257	4.5064	4.78925	4.62179	4.01752	6.09717	5.02222	4.49961	5.24308
hsa-miR-1914-5p	0.0139511	0.0849751	2.12779	up	0.109836	-0.0563602	1.99283	1.52502	1.94146	1.98345	2.17061	1.84791	2.98709	1.92348	2.50454	2.59875
hsa-miR-7974	0.0470182	0.0492222	1.5072	up	3.67966	3.83907	3.8238	3.54712	3.76741	4.0248	4.77772	4.03794	5.27116	3.94021	4.13388	4.07216
hsa-miR-6872-3p	0.0472909	0.048746	1.88157	up	2.52637	-0.0563602	2.72816	2.49585	2.02326	3.34522	4.25178	1.84791	2.98709	3.07503	3.27491	3.09744
hsa-miR-1227-3p	0.0292588	0.0726052	2.041	up	0.109836	-0.0563602	1.7061	1.52502	1.10586	1.55597	2.17061	1.84791	2.98709	1.92348	1.28037	1.91261
hsa-miR-138-1-3p	0.0292588	0.0700121	2.041	up	0.109836	-0.0563602	1.7061	1.52502	1.10586	1.55597	2.17061	1.84791	2.98709	1.92348	1.28037	1.91261
hsa-miR-25-5p	0.0292588	0.0675979	2.041	up	0.109836	-0.0563602	1.7061	1.52502	1.10586	1.55597	2.17061	1.84791	2.98709	1.92348	1.28037	1.91261
hsa-miR-4750-3p	0.0292588	0.0653447	2.041	up	0.109836	-0.0563602	1.7061	1.52502	1.10586	1.55597	2.17061	1.84791	2.98709	1.92348	1.28037	1.91261
hsa-miR-5091	0.0292588	0.0632368	2.041	up	0.109836	-0.0563602	1.7061	1.52502	1.10586	1.55597	2.17061	1.84791	2.98709	1.92348	1.28037	1.91261
hsa-miR-518f-5p	0.0292588	0.0612606	2.041	up	0.109836	-0.0563602	1.7061	1.52502	1.10586	1.55597	2.17061	1.84791	2.98709	1.92348	1.28037	1.91261
hsa-miR-566	0.0292588	0.0594042	2.041	up	0.109836	-0.0563602	1.7061	1.52502	1.10586	1.55597	2.17061	1.84791	2.98709	1.92348	1.28037	1.91261
hsa-miR-567	0.0292588	0.0576571	2.041	up	0.109836	-0.0563602	1.7061	1.52502	1.10586	1.55597	2.17061	1.84791	2.98709	1.92348	1.28037	1.91261
hsa-miR-5699-3p	0.0292588	0.0560097	2.041	up	0.109836	-0.0563602	1.7061	1.52502	1.10586	1.55597	2.17061	1.84791	2.98709	1.92348	1.28037	1.91261
hsa-miR-6793-3p	0.0292588	0.0544539	2.041	up	0.109836	-0.0563602	1.7061	1.52502	1.10586	1.55597	2.17061	1.84791	2.98709	1.92348	1.28037	1.91261
hsa-miR-6796-3p	0.0292588	0.0529822	2.041	up	0.109836	-0.0563602	1.7061	1.52502	1.10586	1.55597	2.17061	1.84791	2.98709	1.92348	1.28037	1.91261
hsa-miR-1287-3p	0.0330525	0.0471174	5.6228	up	1.93005	-0.0563602	-3.09375	-3.1795	1.10586	-3.17316	2.17061	1.84791	-1.9932	1.92348	2.61945	1.91261
hsa-miR-4645-5p	0.0334036	0.0466258	1.98603	up	0.109836	-0.0563602	1.90383	1.52502	1.8737	1.55597	2.17061	1.84791	2.98709	1.92348	2.00963	1.91261
hsa-miR-615-5p	0.0336137	0.0459616	1.96907	up	0.109836	-0.0563602	2.01668	1.52502	1.10586	1.55597	2.17061	1.84791	2.98709	1.92348	1.28037	1.91261
hsa-miR-5008-3p	0.0358824	0.0462331	1.62672	up	1.88345	-0.0563602	2.59388	1.52502	1.94721	1.9782	2.17061	1.84791	2.98709	1.92348	2.58737	2.56672
hsa-miR-4797-5p	0.0378537	0.0478527	1.62858	up	1.93751	-0.0563602	2.58583	1.94968	2.69189	2.02326	2.17061	1.84791	2.98709	2.64927	3.03194	2.6667
hsa-miR-299-5p	0.0383181	0.0475428	1.59314	up	3.37699	3.31028	1.98708	3.26211	4.2177	3.08757	3.31028	3.72511	2.98709	4.67568	5.33423	3.2406
hsa-miR-6785-5p	0.0293816	0.0518044	2.77315	up	6.85361	4.8259	5.0372	7.32696	4.47969	6.00396	4.18257	4.66657	4.08964	4.18257	3.94294	4.63391
hsa-miR-516b-5p	0.0300737	0.051665	8.29714	down	0.109836	-0.0563602	1.7061	1.52502	1.10586	1.55597	-3.00267	1.84791	-1.9932	-3.03621	-3.21935	-2.96574
hsa-miR-1272	0.0311552	0.052185	6.15731	down	0.109836	-3.32195	1.7061	1.52502	-3.2339	1.55597	-3.00267	-3.17555	-1.9932	-3.03621	-3.21935	-2.96574
hsa-miR-34c-3p	0.0311552	0.0509122	6.15731	down	0.109836	-3.32195	1.7061	1.52502	-3.2339	1.55597	-3.00267	-3.17555	-1.9932	-3.03621	-3.21935	-2.96574
hsa-miR-7161-5p	0.0311552	0.0497	6.15731	down	0.109836	-3.32195	1.7061	1.52502	-3.2339	1.55597	-3.00267	-3.17555	-1.9932	-3.03621	-3.21935	-2.96574
hsa-miR-513a-5p	0.0314797	0.0490498	1.77331	down	7.25845	6.63031	6.02863	7.02451	6.21793	6.64457	6.04037	6.81826	4.27706	5.9226	5.51312	6.27429
hsa-miR-206	0.0314829	0.0479399	7.40351	down	2.56672	3.07238	1.7061	2.99777	1.88864	2.78003	2.17061	1.84791	-1.9932	-3.03621	-3.21935	1.91261
hsa-miR-595	0.0318888	0.0464468	2.98336	down	3.09469	4.25992	1.7061	3.38115	2.5277	3.10164	2.99777	1.84791	-1.9932	1.92348	1.28037	2.55325
hsa-miR-513c-5p	0.0437493	0.0472775	1.58056	down	5.10424	4.37719	3.7362	4.81692	3.73296	4.10367	3.72283	4.59946	2.98709	3.55075	3.29215	3.75631
hsa-miR-129-5p	0.0457103	0.0486126	4.75744	down	0.109836	-0.0563602	1.7061	1.52502	1.10586	1.55597	-3.00267	-3.17555	-1.9932	1.92348	-3.21935	1.91261
hsa-miR-7850-5p	0.041378	0.0486373	5.45148	down	1.88656	2.94076	1.7061	1.52502	1.92506	-3.17316	-3.00267	1.84791	-1.9932	-3.03621	1.28037	-2.96574
hsa-miR-424-3p	0.0415565	0.0480049	4.97015	down	0.109836	-0.0563602	1.7061	1.52502	1.10586	1.55597	-3.00267	-3.17555	-1.9932	1.92348	1.28037	-2.96574
hsa-miR-3679-3p	0.0424335	0.0481872	5.63562	down	-3.30217	-0.0563602	1.7061	1.52502	1.10586	1.55597	-3.00267	-3.17555	-1.9932	1.92348	-3.21935	-2.96574
hsa-miR-4750-5p	0.0432601	0.0483071	2.52152	down	4.13178	4.41922	1.7061	2.88461	2.64927	3.06607	3.07238	3.83099	-1.9932	1.92348	1.28037	2.73729
hsa-miR-7156-3p	0.0343085	0.0459734	6.04457	down	0.109836	-3.32195	1.7061	1.52502	1.10586	1.55597	-3.00267	-3.17555	-1.9932	-3.03621	1.28037	-2.96574
hsa-miR-2278	0.0345107	0.0453376	5.44215	down	2.63649	3.81799	1.7061	1.52502	1.10586	1.55597	2.17061	1.84791	-1.9932	-3.03621	-3.21935	1.91261
hsa-miR-1180-3p	0.0481517	0.0488812	2.46977	down	2.84535	3.59529	1.7061	2.98604	2.59875	2.78527	2.17061	2.76965	-1.9932	1.92348	1.28037	2.53962
hsa-miR-5708	2.561e-05	0.00171587	18.5716	down	0.109836	1.89464	1.7061	1.52502	1.10586	1.55597	-3.00267	-3.17555	-1.9932	-3.03621	-3.21935	-2.96574
hsa-miR-6510-5p	0.00407769	0.0910685	1.50195	down	4.69995	4.40593	3.65134	4.57061	3.51319	3.94294	3.99902	4.06358	2.98709	3.54712	3.30383	3.36228
hsa-miR-1291	0.00832101	0.139377	8.43741	down	0.109836	-0.0563602	1.7061	1.52502	1.10586	1.55597	-3.00267	-3.17555	-1.9932	-3.03621	-3.21935	1.91261
hsa-miR-670-5p	0.00884024	0.0987161	3.43884	down	3.10744	3.89873	1.7061	3.67158	2.7175	3.69173	2.17061	1.84791	-1.9932	1.92348	1.28037	2.87237
hsa-miR-5003-3p	0.0132713	0.0889178	8.28884	down	2.51797	2.5013	1.90493	1.52502	1.10586	1.55597	2.17061	1.84791	-1.9932	-3.03621	-3.21935	-2.96574
hsa-miR-7844-5p	0.01493	0.0833592	3.10194	down	3.25052	3.61676	1.7061	3.41019	2.55097	3.17405	2.17061	1.84791	-1.9932	1.92348	1.28037	2.68041
hsa-miR-8063	0.0153227	0.0789709	1.55547	down	5.95988	5.80624	5.79372	6.07928	5.08955	5.60169	5.02843	4.8925	5.60832	4.96429	5.03338	4.97931
hsa-miR-4748	0.0155481	0.0744087	11.2218	down	2.49992	-0.0563602	-3.09375	1.52502	1.10586	1.55597	-3.00267	-3.17555	-1.9932	-3.03621	-3.21935	-2.96574
hsa-miR-4428	0.0160825	0.0718353	1.64301	down	5.72439	4.89967	5.32115	6.18331	4.93569	5.51741	4.5224	4.71326	4.63391	4.76426	4.53955	5.11022
hsa-miR-7161-3p	0.0171749	0.07192	8.51427	down	0.109836	-0.0563602	-3.09375	1.52502	1.10586	1.55597	-3.00267	-3.17555	-1.9932	-3.03621	-3.21935	-2.96574
hsa-miR-4459	0.0180223	0.071029	1.62828	down	9.08146	8.9517	8.24061	8.64286	7.59704	7.75493	7.8868	8.9517	7.55766	7.30836	6.98217	7.36182
hsa-miR-1246	0.0191817	0.0713987	2.41316	down	6.27429	5.60832	5.83198	6.81826	5.7103	6.69516	4.95179	5.32569	2.98709	5.22315	5.20257	5.62248
hsa-miR-6769b-5p	0.0196387	0.0692522	1.7215	down	5.39508	4.56549	4.0248	3.92263	4.2469	4.34337	3.94294	4.56549	2.98709	2.62469	3.85227	3.8238
hsa-miR-494-3p	0.0213137	0.0714007	1.79654	down	10.2782	9.60862	9.77059	10.4604	9.28075	10.1052	9.23917	9.90547	8.55352	8.92754	8.47229	9.33449
hsa-miR-1321	0.0253396	0.0808455	10.2566	down	1.94505	-0.0563602	1.7061	1.52502	1.10586	1.55597	-3.00267	1.84791	-1.9932	-3.03621	-3.21935	-2.96574
hsa-miR-6129	0.0253703	0.0772641	13.5121	down	3.15806	-0.0563602	1.7061	2.69818	1.10586	1.55597	-3.00267	1.84791	-1.9932	-3.03621	-3.21935	-2.96574
hsa-miR-7107-5p	0.0264975	0.0771885	1.5799	down	6.29957	5.7103	5.07017	5.95324	4.92262	5.12387	5.12981	5.67865	4.46298	4.5627	4.5224	4.76426
hsa-miR-3650	0.0389433	0.04744	4.89977	down	0.109836	-0.0563602	1.7061	-3.1795	1.10586	1.55597	-3.00267	-3.17555	-1.9932	-3.03621	-3.21935	1.91261
hsa-miR-1228-5p	0.0268721	0.0720172	2.80888	down	2.79726	3.7474	1.7061	3.09469	1.99902	2.73729	2.17061	1.84791	-1.9932	1.92348	1.28037	1.91261
hsa-miR-328-5p	0.0279916	0.0721322	1.50588	down	3.5655	3.08174	3.39666	3.64126	3.12584	3.55929	2.17061	3.06798	2.98709	2.82748	2.76085	3.01266

## Sheet: Figure 2-raw data
Expression of miR-25-5p				Expression of miR-34c-3p				Expression of miR-206				Expression of miR-129-5p				Expression of miR-494-3p				Expression of miR-299-5p
Number	Before	After	Adjsuted p value	Number	Before	After	Adjsuted p value	Number	Before	After	Adjsuted p value	Number	Before	After	Adjsuted p value	Number	Before	After	Adjsuted p value	Number	Before	After	Adjsuted p value
7	0.890899	1	0.032	7	0.707107	0.0539089	0.016	7	1.8025	0.997692	0.003	7	1.32869	1.00231	0.52	7	1.21419	1.00231	0.826	7	0.269807	0.997692	0.098
8	1.11729	0.559936		8	0.337587	0.404254		8	1.35347	3.63847		8	0.793701	0.920188		8	3.45815	0.486327		8	0.286512	0.0712977
9	5.26585	2.25012		9	0.134592	0.136156		9	6.20458	3.74076		9	5.00487	2.50244		9	33.2051	11.0298		9	0.474123	0.0717936
10	2.07532	2.01857		10	0.107818	0.195693		10	1.98618	1.63203		10	1.92741	2.30804		10	37.0996	2.42279		10	0.0420039	0.0501827
11	4.20858	2.27101		11	0.138057	0.236514		11	5.2537	2.08012		11	5.14558	1.31951		11	38.8542	22.5752		11	0.655197	0.177595
12	1.66632	0.343886		12	0.0767689	0.212176		12	3.12387	1.4811		12	2.06575	2.32947		12	15.5625	79.3413		12	0.201195	0.0435354
13	4.09349	2.13366		13	0.242603	0.122711		13	2.80889	1.21982		13	2.09459	1.62076		13	50.5626	9.00047		13	0.132127	0.0425902
14	5.72258	5.72258		14	0.254664	0.125579		14	6.43824	2.87454		14	1.65864	0.379806		14	41.8358	23.5339		14	0.336808	0.153893
15	5.48947	4.71307		15	0.175962	0.150726		15	8.64381	3.13109		15	0.718636	0.631418		15	37.1855	24.3076		15	0.00309324	0.63728
16	1.23399	1.26576		16	0.0441942	0.604299		16	0.439317	0.539614		16	0.676737	0.670511		16	41.2598	23.9729		16	1.17419	0.0214185
17	1.54757	0.261823		17	0.0571145	0.0701539		17	0.933033	0.0491499		17	0.587774	0.773782		17	4.16024	49.0665		17	0.0953912	0.0719597
18	1.63203	0.254076		18	0.0513556	0.0461775		18	1.19472	0.068078		18	0.749154	0.561231		18	24.761	29.8571		18	0.249423	0.31498
19	2.59668	0.224793		19	0.209255	0.112656		19	1.72907	0.0456471		19	0.562529	0.80478		19	18.4643	24.8757		19	0.68302	0.204004
20	1.1434	0.29937		20	0.737135	0.24429		20	1.0693	0.0532897		20	1.09936	1.29235		20	24.9333	26.5382		20	0.0719597	0.0299078
21	0.556068	2.34567		21	0.601513	1.00231		21	0.649169	1.79419		21	0.926588	2.25012		21	5.1337	26.4159		21	0.0257968	0.00926924
22	1.33176	3.6217		22	0.118805	0.122428		22	1.21419	1.95432		22	2.02324	1.42734		22	9.29636	25.8722		22	0.150031	0.0286895
23	5.81589	2.75745		23	0.356836	0.147624		23	8.39773	1.5728		23	0.866537	1.83189		23	18.9834	18.9834		23	0.0549146	0.118531
24	0.884745	3.58838		24	0.032352	0.0778406		24	0.850667	1.53333		24	0.63728	2.56093		24	36.4202	48.7276		24	0.0822789	0.0194152
25	2.28681	4.09349		25	0.33294	0.154427		25	2.11893	1.69741		25	0.870551	1.65099		25	17.4683	25.8722		25	0.0440922	0.0944045
26	6.04887	2.32409		26	0.323088	0.123279		26	4.41782	1.82344		26	1.43396	0.911722		26	1.21982	14.1887		26	0.0448111	0.690956
27	0.121301	4.36707		27	1.21139	0.0669858		27	5.43897	1.62826		27	1.65481	2.61474		27	0.456916	7.76328		27	0.632878	0.0150579
28	1.91853	4.87927		28	0.248847	0.0717936		28	3.49026	0.0610725		28	1.95432	1.70133		28	43.5118	12.3234		28	0.221698	0.178418
29	3.97237	3.24151		29	1.5874	0.433269		29	5.1337	2.88119		29	3.68926	3.06666		29	48.5029	38.8542		29	1.28482e-06	0.443396
30	0.673617	7.21		30	2.16345	0.0987552		30	1.54399	1.28046		30	0.82169	5.06303		30	23.1563	9.14722		30	0.0542838	0.0304658
31	1.43727	5.12186		31	0.304251	0.115023		31	7.42985	2.78949		31	1.70921	4.03714		31	55.8441	23.3713		31	0.544624	0.100134
32	0.399611	7.14368		32	0.401461	0.175556		32	0.631418	2.21402		32	0.183434	2.19872		32	109.643	97.9065		32	0.0507658	0.0213938
33	0.378929	4.82323		33	0.189465	0.112656		33	1.65481	1.95884		33	5.68305	3.53898		33	10.1495	38.0546		33	0.000157758	0.00519018
34	0.240927	8.263		34	0.768438	0.110083		34	3.06666	0.567752		34	1.41095	3.68926		34	1.88775	44.3235		34	0.269807	0.095833
35	0.250578	6.21893		35	0.880666	0.354371		35	1.4811	0.76313		35	6.00709	5.89708		35	121.375	7.27695		35	0.00852944	0.0489233
36	0.350301	4.89056		36	0.109576	0.0519524		36	0.825496	0.0441942		36	0.770215	2.56093		36	19.0273	76.6386		36	0.511687	0.0311779
37	0.366868	3.41054		37	1.38191	0.681444		37	1.64718	1.50873		37	1.63203	1.70527		37	23.9729	32.2971		37	0.689362	0.0551689

## Sheet: Figure 3-raw data
Number(Before)	OD	Number(After)	OD		Number(After)	OD	expression of miR-25-5p		Number(After)	OD	expression of miR-34c-3p		Number(After)	OD	expression of miR-206
7	0.0952	7	3.0731		7	3.0731	1		7	3.0731	0.0539089		7	3.0731	0.997692
8	0.0693	8	1.9252		8	1.9252	0.559936		8	1.9252	0.404254		8	1.9252	3.63847
9	0.3074	9	2.1707		9	2.1707	2.25012		9	2.1707	0.136156		9	2.1707	3.74076
10	0.1474	10	2.2814		10	2.2814	2.01857		10	2.2814	0.195693		10	2.2814	1.63203
11	0.2351	11	2.3097		11	2.3097	2.27101		11	2.3097	0.236514		11	2.3097	2.08012
12	0.0529	12	2.4656		12	2.4656	0.343886		12	2.4656	0.212176		12	2.4656	1.4811
13	0.1779	13	2.9764		13	2.9764	2.13366		13	2.9764	0.122711		13	2.9764	1.21982
14	0.1737	14	2.683		14	2.683	5.72258		14	2.683	0.125579		14	2.683	2.87454
15	0.0891	15	2.6174		15	2.6174	4.71307		15	2.6174	0.150726		15	2.6174	3.13109
16	0.3366	16	3.2229		16	3.2229	1.26576		16	3.2229	0.604299		16	3.2229	0.539614
17	0.3219	17	2.8541		17	2.8541	0.261823		17	2.8541	0.0701539		17	2.8541	0.0491499
18	0.3555	18	3.2468		18	3.2468	0.254076		18	3.2468	0.0461775		18	3.2468	0.068078
19	0.1108	19	3.2955		19	3.2955	0.224793		19	3.2955	0.112656		19	3.2955	0.0456471
20	0.2777	20	2.2885		20	2.2885	0.29937		20	2.2885	0.24429		20	2.2885	0.0532897
21	0.2274	21	2.8738		21	2.8738	2.34567		21	2.8738	1.00231		21	2.8738	1.79419
22	0.1621	22	2.6721		22	2.6721	3.6217		22	2.6721	0.122428		22	2.6721	1.95432
23	0.1231	23	3.2693		23	3.2693	2.75745		23	3.2693	0.147624		23	3.2693	1.5728
24	0.5688	24	3.1736		24	3.1736	3.58838		24	3.1736	0.0778406		24	3.1736	1.53333
25	0.1989	25	3.3152		25	3.3152	4.09349		25	3.3152	0.154427		25	3.3152	1.69741
26	0.3703	26	2.8005		26	2.8005	2.32409		26	2.8005	0.123279		26	2.8005	1.82344
27	0.6477	27	3.0649		27	3.0649	4.36707		27	3.0649	0.0669858		27	3.0649	1.62826
28	0.0987	28	3.3852		28	3.3852	4.87927		28	3.3852	0.0717936		28	3.3852	0.0610725
29	0.0866	29	1.8062		29	1.8062	3.24151		29	1.8062	0.433269		29	1.8062	2.88119
30	0.358	30	3.2445		30	3.2445	7.21		30	3.2445	0.0987552		30	3.2445	1.28046
31	0.0701	31	3.2534		31	3.2534	5.12186		31	3.2534	0.115023		31	3.2534	2.78949
32	0.1336	32	3.1008		32	3.1008	7.14368		32	3.1008	0.175556		32	3.1008	2.21402
33	0.2249	33	3.396		33	3.396	4.82323		33	3.396	0.112656		33	3.396	1.95884
34	0.1042	34	3.3996		34	3.3996	8.263		34	3.3996	0.110083		34	3.3996	0.567752
35	0.2689	35	3.4491		35	3.4491	6.21893		35	3.4491	0.354371		35	3.4491	0.76313
36	0.2248	36	3.3321		36	3.3321	4.89056		36	3.3321	0.0519524		36	3.3321	0.0441942
37	0.1658	37	2.7108		37	2.7108	3.41054		37	2.7108	0.681444		37	2.7108	1.50873

## Sheet: Figure 4-raw data
miRNA	#Term	P-Value	Adjusted P-Value
miR-34c-3p	Cellular senescence	1.4572e-05	0.00326413
miR-34c-3p	Hippo signaling pathway	7.42388e-05	0.00831474
miR-34c-3p	Dopaminergic synapse	0.00017714	0.0108168
miR-34c-3p	Apelin signaling pathway	0.000230118	0.0108168
miR-34c-3p	Signaling pathways regulating pluripotency of stem cells	0.000261022	0.0108168
miR-34c-3p	MAPK signaling pathway	0.000289737	0.0108168
miR-34c-3p	Long-term potentiation	0.000360932	0.0114772
miR-34c-3p	Renin secretion	0.0004099	0.0114772
miR-34c-3p	Cushing syndrome	0.00251069	0.0281197
miR-206	Thyroid hormone signaling pathway	0.00069695	0.0283812
miR-206	Human papillomavirus infection	0.000804022	0.0283812
miR-206	Tight junction	0.00249668	0.0449182
miR-25-5p	Endocytosis	0.00286652	0.0155429

## Sheet: Figure 5-raw data
miRNA	Pathways	Genes
miR-34c-3p	hsa04390:Hippo signaling pathway	FZD3|PPP1CC|SMAD2|CTNNA1|MOB1B|GSK3B|YWHAG|AMOT
miR-34c-3p	hsa04010:MAPK signaling pathway	PPP3CB|MRAS|PPM1A|MAP3K2|CACNA1E|RAP1B|MEF2C|IL1A|KITLG|FLT3
miR-206	hsa05165:Human papillomavirus infection	HEYL|CCND2|NOTCH3|COL4A3|PRKACB|CDC42
miR-206	hsa04530:Tight junction	CDC42|AMOT|PRKCE|PRKACB
miR-25-5p	hsa04144:Endocytosis	MVB12B|PIP5K1C|SMURF1
